# Supplementary material for: An organic phase transmetallation approach for synthesis of hollow Ni–Au nanocomposites with tunable cavity size
Source: Royal Society of Chemistry journal article supplement (doi:10.1039/c8nj03668c), 2018-01-01
Supplement: c8nj03668c1.pdf [file c8nj03668c1.pdf]

## Supporting Information

### An organic phase transmetallation approach for the synthesis of hollow Ni-Au nanocomposite with a tunable cavity size

Debasmita Sardar, Md Azaharuddin Ahmed, Sudipta Bandyopadhyay, Manoj Kumar Ghosalya and Tanushree Bala \*

#### Supporting Information SI-1

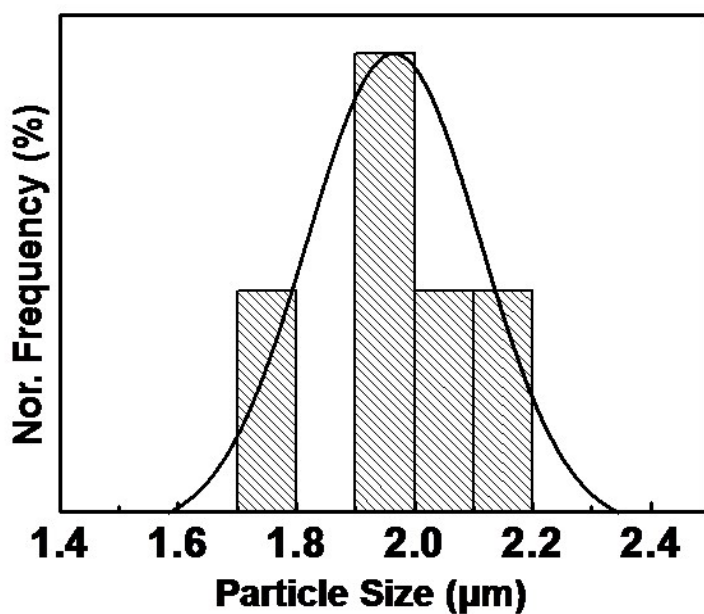

Fig. SI-1 Particle size distribution histogram of phase transferred Ni nanoparticles.

## Supporting Information SI-2

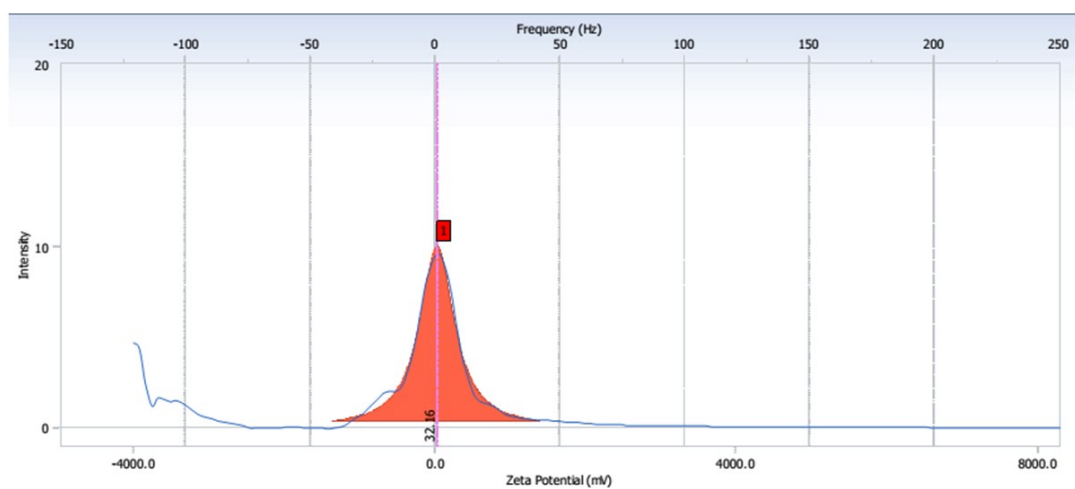

**Fig. SI-2** Raw data of Zeta potential of phase transferred Ni nanoparticles.

### Supporting Information SI-3

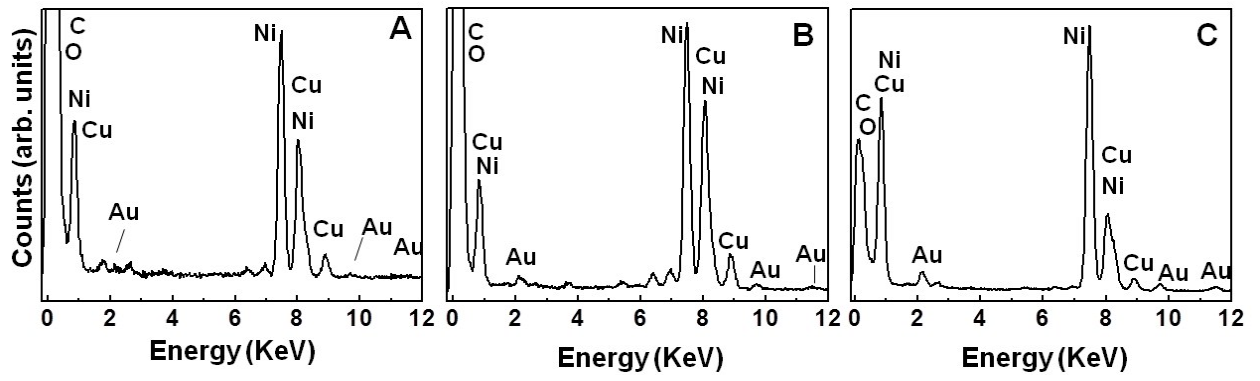

Fig. SI-3 EDX spectra of (A) Sample-1 (B) Sample-2 and (C) Sample-3 of Ni-Au nanocomposite.
